# Supplementary material
Source: ML conference proceedings conference paper supplement (https://aclanthology.org/D18-1081)
Supplement: Attachment [file D18-1081.Attachment.zip]

# BLEU is Not Suitable for the Evaluation of Text Simplification

## Guidelines for Sentence Splitting

Set 1:

### **Task:**

In the present task, you will see sentences in English taken from Wikipedia.

For each of the following sentences, split the sentence into as many sentences as possible.

The resulting sentences, taken together, should mean the same as the original sentence, be grammatical and fluent. If no such splitting is possible in a given sentence, leave the sentence as it is.

Write your answer in the box appearing below the original sentence.

### **Examples:**

Here are 2 examples of sentence splitting. In both cases, the resulted text does not necessarily constitute a maximal splitting of the sentence.

1. The federal government suspended sales of U.S. savings bonds because Congress hasn't lifted the ceiling on government debt.

Congress hasn't lifted the ceiling on government debt. So, the federal government suspended sales of U.S. savings bonds.

2. He was involved in two conversions which turned out to be crucial.

He was involved in two conversions. These conversions turned out to be crucial.

Set 2:

### **Task:**

In the present task, you will see sentences in English taken from Wikipedia.

For each of the following sentences, split the sentence as much as possible, into several sentences in places where such a splitting could make the sentence simpler. The resulting sentences, taken together, should mean the same as the original sentence, be grammatical and fluent. If no such a splitting is possible in a given sentence, leave the sentence as it is.

Write your answer in the box appearing below the original sentence.
